# Supplementary material for: Evaluation of Allelic Expression of Imprinted Genes in Adult Human Blood
Source: PLOS journal article supplement (doi:10.1371/journal.pone.0013556), 2010-10-21
Supplement: S2 (10.1371/journal.pone.0013556.s002) [file journal.pone.0013556.s002]

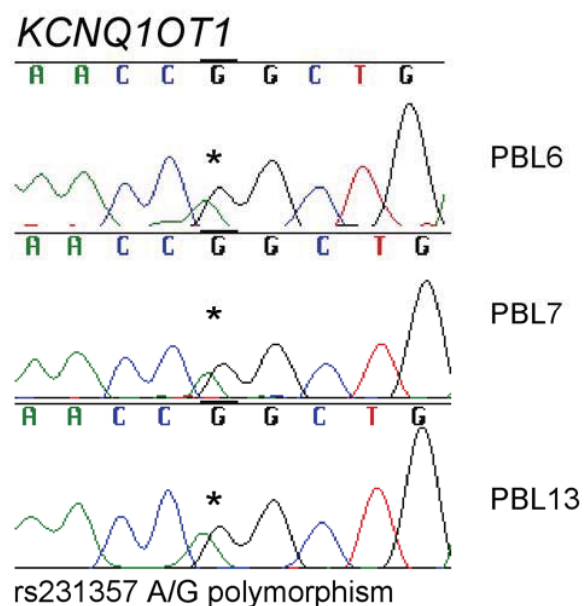

## S2. Strand specific RT-PCR of *KCNQ1OT1*

cDNA was created as before except random primers were not included and reverse transcriptase was primed using *B-ACTIN* and *KCNQ1OT1* reverse primers. 2 ug RNA was converted to cDNA using MMLV reverse transcriptase and RT- samples created in parallel with MMLV RT omitted. *B-ACTIN* RT-PCR for 30 cycles confirmed successful cDNA synthesis without DNA contamination. *KCNQ1OT1* RT-PCR was carried out for samples informative for the rs231357 A/T polymorphism in *KCNQ1OT1* (PBL6, PBL7 and PBL13) using 2 ul of RT+ and RT- for each sample. RT-PCR was carried out for 40 cycles and the amplicons sequenced in the forwards direction. In each case, *KCNQ1OT1* was found to be biallelically expressed.
